# Supplementary material for: BRCA1 degradation in response to mitochondrial damage in breast cancer cells
Source: PubMed Central journal article supplement (PMC8062582; doi:10.1038/s41598-021-87698-7), 2021-04-22
Supplement: 41598_2021_87698_MOESM1_ESM.pdf [file 41598_2021_87698_MOESM1_ESM.pdf]

## Supplementary information

### **BRCA1 degradation in response to mitochondrial damage in breast cancer cells**

Kana Miyahara<sup>a,1</sup>, Naoharu Takano<sup>b,1</sup>, Yumiko Yamada<sup>b</sup>, Hiromi Kazama<sup>b</sup>, Mayumi Tokuhisa<sup>b</sup>, Hirotsugu Hino<sup>b</sup>, Koji Fujita<sup>c</sup>, Edward Barroga<sup>d</sup>, Masaki Hiramoto<sup>b</sup>, Hiroshi Handa<sup>c</sup>, Masahiko Kuroda<sup>c</sup>, Takashi Ishikawa<sup>a</sup>, Keisuke Miyazawa<sup>b</sup>

<sup>a</sup>Department of Breast Oncology and Surgery, <sup>b</sup>Department of Biochemistry, <sup>c</sup>Department of Molecular Pathology, and <sup>d</sup>Department of Nanoparticle Translational Research, Tokyo Medical University, Shinjuku, Tokyo 160-8402, Japan; <sup>d</sup>St. Luke's International University, Tokyo 104-0044, Japan. <sup>1</sup>These authors contributed equally.

## **Supporting Information**

### **Materials and Methods**

#### **Cell lines**

ATG5-KO A549 cells were established as shown previously (Hino et al.). Control and PINK1 KO A549 cells were established with pCas9-sgNega and pCas9-sgPINK1#1 vectors. MCF7 sgNega5-Tet-shNT, sgNega-Tet-shBRCA1#3, sgPINK1-Tet-shNT, and sgPINK1#2-Tet-shBRCA1#3 were established by lentivirus infection and selection with puromycin. PINK KO MDA-MB-231 and MDA-MB-468 cells were established as shown in “Materials and Methods” in main text.

#### **Cell cycle analysis**

Cells were cultured in the presence or absence of the 10  $\mu$ M CCCP for 24 hours, and then harvested with trypsin. Nuclear DNA was stained with CyStain DNA 2 step kit (Sysmex, Kobe, Japan) and measured by flow cytometer. The cell cycle profile was analyzed with ModFit LT (Verity Software House, Topsham, ME, USA).

### **References**

1. Hino H, et al. Abemaciclib induces atypical cell death in cancer cells characterized by formation of cytoplasmic vacuoles derived from lysosomes. *Cancer Sci* 111, 2132-2145 (2020).

| Patient # | Invasive tumor size (cm) | Node number | Pathological Stage | Subtype         |
|-----------|--------------------------|-------------|--------------------|-----------------|
| 1         | 1.5                      | 0           | I                  | Luminal         |
| 2         | 4.4                      | 6           | IIIA               | Luminal         |
| 3         | 1.5                      | 0           | I                  | Luminal         |
| 4         | 2.0                      | 0           | I                  | Luminal         |
| 5         | 2.0                      | 0           | I                  | Luminal         |
| 6         | 1.8                      | 0           | I                  | Luminal         |
| 7         | 3.8                      | 0           | II                 | Luminal         |
| 8         | 6.2                      | 6           | IIIB               | Luminal         |
| 9         | 3.5                      | 0           | II                 | Luminal         |
| 10        | 1.6                      | 1           | IIA                | Luminal         |
| 11        | 1.6                      | 1           | IIA                | Luminal HER2    |
| 12        | 2.7                      | 2           | II B               | Luminal HER2    |
| 13        | 1.2                      | 0           | I                  | Luminal HER2    |
| 14        | 1.6                      | 2           | IIA                | Luminal HER2    |
| 15        | 1.6                      | 0           | I                  | Luminal HER2    |
| 16        | 1.9                      | 0           | I                  | Luminal HER2    |
| 17        | 1.5                      | 0           | I                  | Luminal HER2    |
| 18        | 1.7                      | 1           | IIA                | Luminal HER2    |
| 19        | 2.2                      | 1           | IIB                | Luminal HER2    |
| 20        | 3.2                      | 0           | IIA                | Luminal HER2    |
| 21        | 1.3                      | 1           | IIA                | Luminal HER2    |
| 22        | 0.6                      | 0           | I                  | HER2            |
| 23        | 0.7                      | 0           | I                  | HER2            |
| 24        | 0.8                      | 0           | I                  | HER2            |
| 25        | 0.5                      | 0           | I                  | HER2            |
| 26        | 2.5                      | 0           | IIA                | HER2            |
| 27        | 0.5                      | 1           | IIA                | HER2            |
| 28        | 1.2                      | 0           | I                  | Triple-negative |
| 29        | 9.0                      | -           | -                  | Triple-negative |
| 30        | 0.7                      | 0           | I                  | Triple-negative |
| 31        | 2.5                      | 0           | IIA                | Triple-negative |
| 32        | 4.4                      | 4           | IIIA               | Triple-negative |
| 33        | 1.3                      | 0           | I                  | Triple-negative |
| 34        | 1.8                      | 0           | I                  | Triple-negative |

**Table S1. Clinicopathological characteristics of breast cancer patients.** Related to Methods.

| Designation                           | Sequence                                                         |
|---------------------------------------|------------------------------------------------------------------|
| <b>DNA sequence for shRNA vector</b>  |                                                                  |
| shNT                                  | 5'-CCGGCAACAAGATGAAGAGCACCAACTCGAGTTGGTGCTCTTCATCTTGTTGTTTTG-3'  |
| shBRCA1#1                             | 5'-CCGGGAGTATGCAAACAGCTATAATCTCGAGATTATAGCTGTTGCATACTCTTTTTG-3'  |
| shBRCA1#3                             | 5'-CCGGACTGATACTGCTGGGTATAATCTCGAGATTATACCCAGCAGTATCAGTTTTTTG-3' |
| <b>DNA sequence for pCas9 vector</b>  |                                                                  |
| sgNega                                | 5'-CACCGGTAGCGAACGTGTCCGGCGT-3'                                  |
| sgPINK1#1                             | 5'-CACCGGTCTCGTGTCCAACGGGTC-3'                                   |
| sgPINK1#2                             | 5'-CACCGCGCCACCATGGCGGTGCGAC-3'                                  |
| <b>DNA sequence for real-time PCR</b> |                                                                  |
| hBRCA1 Fwd                            | 5'-GAAACCGTGCCAAAAGACTTC-3'                                      |
| hBRCA1 Rev                            | 5'-CCAAGGTTAGAGAGTTGGACAC-3'                                     |
| hHPRT1 Fwd                            | 5'-GAAAAGGACCCACGAAGTGT-3'                                       |
| hHPRT1 Rev                            | 5'-AGTCAAGGGCATATCCTACAACA-3'                                    |

**Table S2. shRNA and primer sequences.** Related to Methods. The DNA sequences used for shRNA vector and pCas9 vector construction and the primer sequences used for real-time PCR are listed.

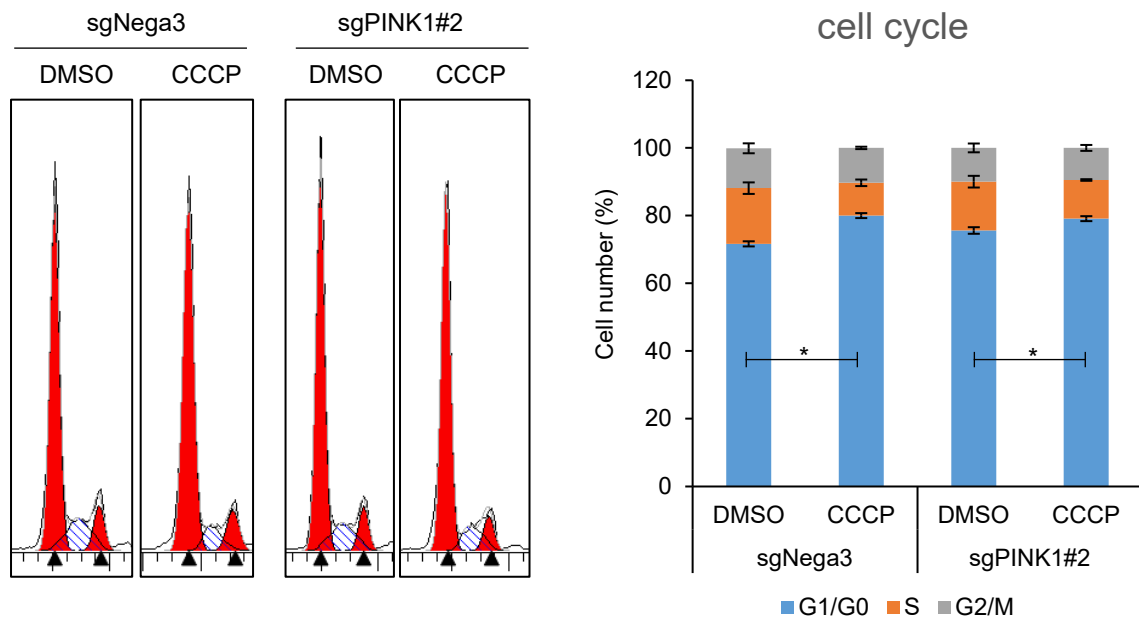

**Fig. S1. G0/G1 phase was increased by CCCP treatment in control cells as well as PINK1 knockout cells.** Cell cycle profiles were analyzed by flow cytometer. Representative data of DNA contents distribution was shown in left and summarized graph was shown in right. Bar = means  $\pm$  S.D.,  $n = 5$ ,  $*p < 0.05$  versus DMSO.

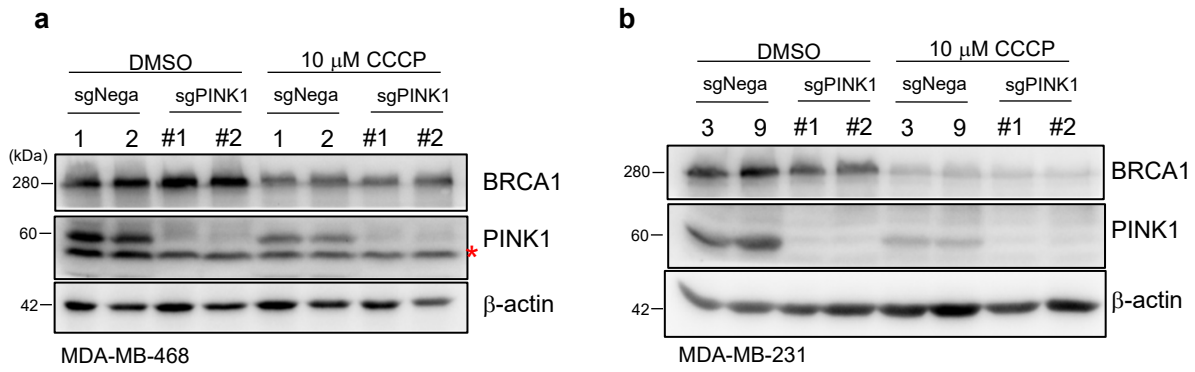

**Fig. S2. PINK1-KO in MDA-MB-468 and MDA-MB-231 cells.** (a) Control or PINK1-KO MDA-MB-468 cells were treated with CCCP for 24 h and the BRCA1 and PINK1 expression levels were assessed. The asterisk indicates a non-specific band. (b) Control or PINK1-KO MDA-MB-231 cells were treated with CCCP for 24 h and assessed for BRCA1 and PINK1 expression levels.

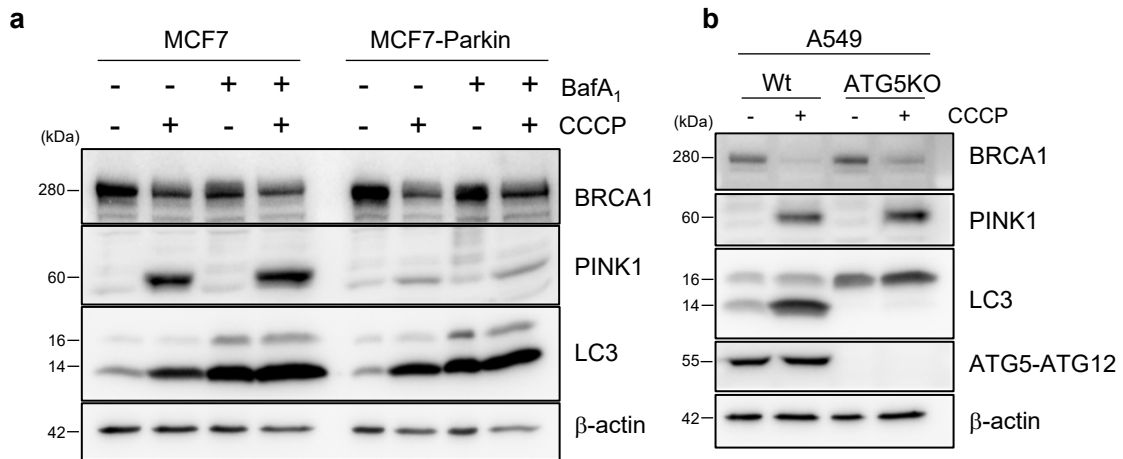

**Fig. S3. BRCA1 degradation is independent from autophagy.** (a) MCF7 cells and FLAG-Parkin expressing MCF7 cells were treated with 10  $\mu$ M CCCP and 10 nM bafilomycin A<sub>1</sub> for 24 h, and then BRCA1 protein level was assessed by Western blotting. (b) Wild type and ATG5-KO A549 cells were treated with CCCP for 24 h.

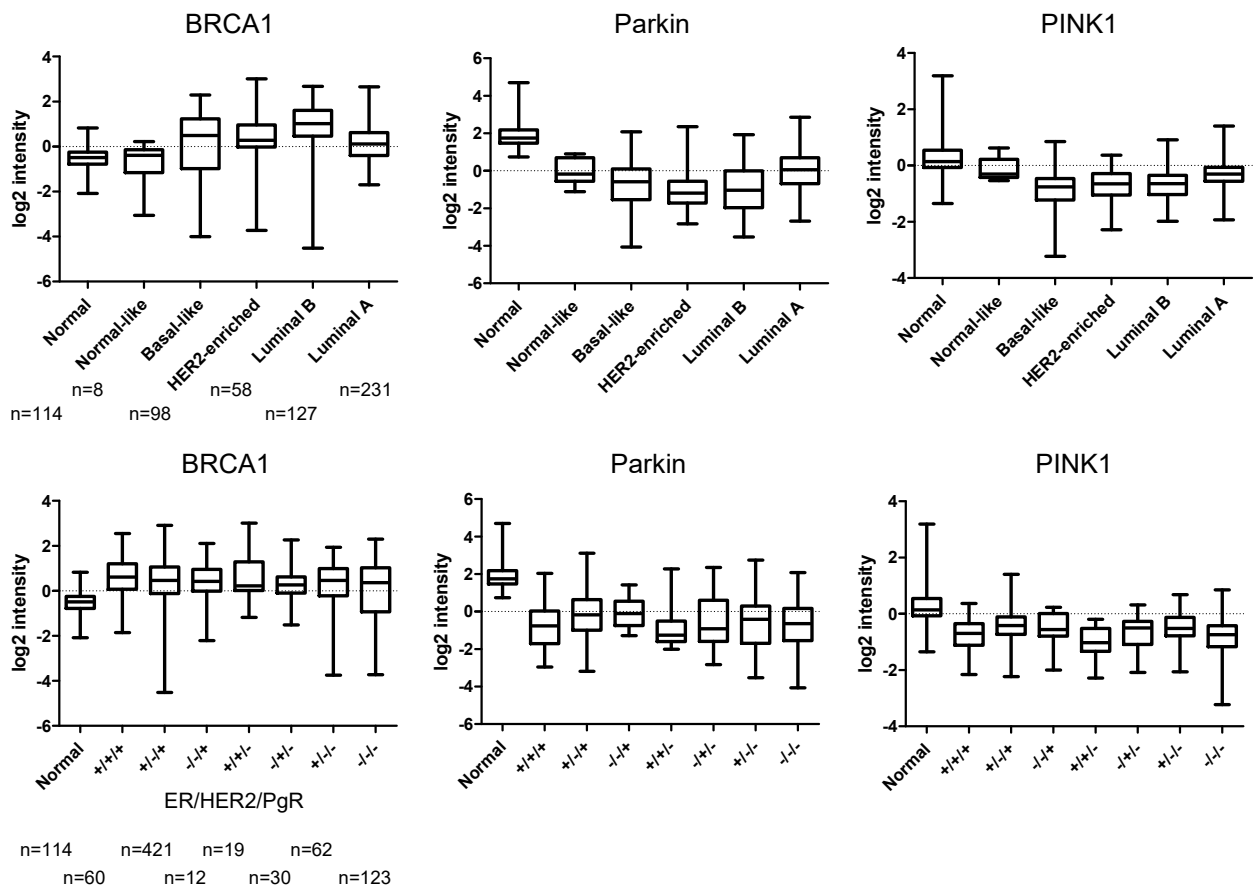

**Fig. S4. BRCA1, Parkin, and PINK1 expressions in different breast cancer subtypes.** Gene expression profiles of BRCA1, Parkin, and PINK1 were obtained from the publicly available TCGA database. Breast cancer samples were classified depending on the intrinsic subtypes or ER/PR/HER2 expression pattern, and then compared.



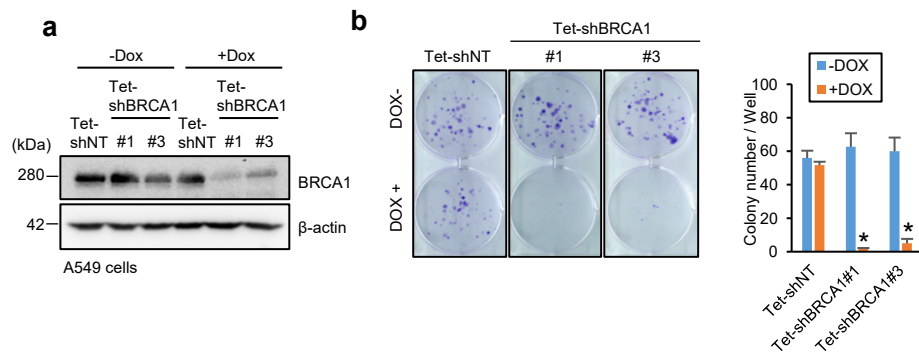

**Fig. S5. BRCA1 knockdown suppressed the colony formation ability of A549 cells.** (a) Tetracycline-inducible shRNA against BRCA1 or control vector was stably introduced into A549 cells. BRCA1 knockdown efficiency was assessed by Western blotting after 0.1  $\mu\text{g}/\text{mL}$  DOX treatment for 2 days. (b) Colony formation ability in the presence or absence of DOX. Visualized colonies are shown on the left side, and colony numbers (i.e., graph) are shown on the right side. Bar = means  $\pm$  S.E.,  $n = 3$ , \* $p < 0.05$  versus -DOX.

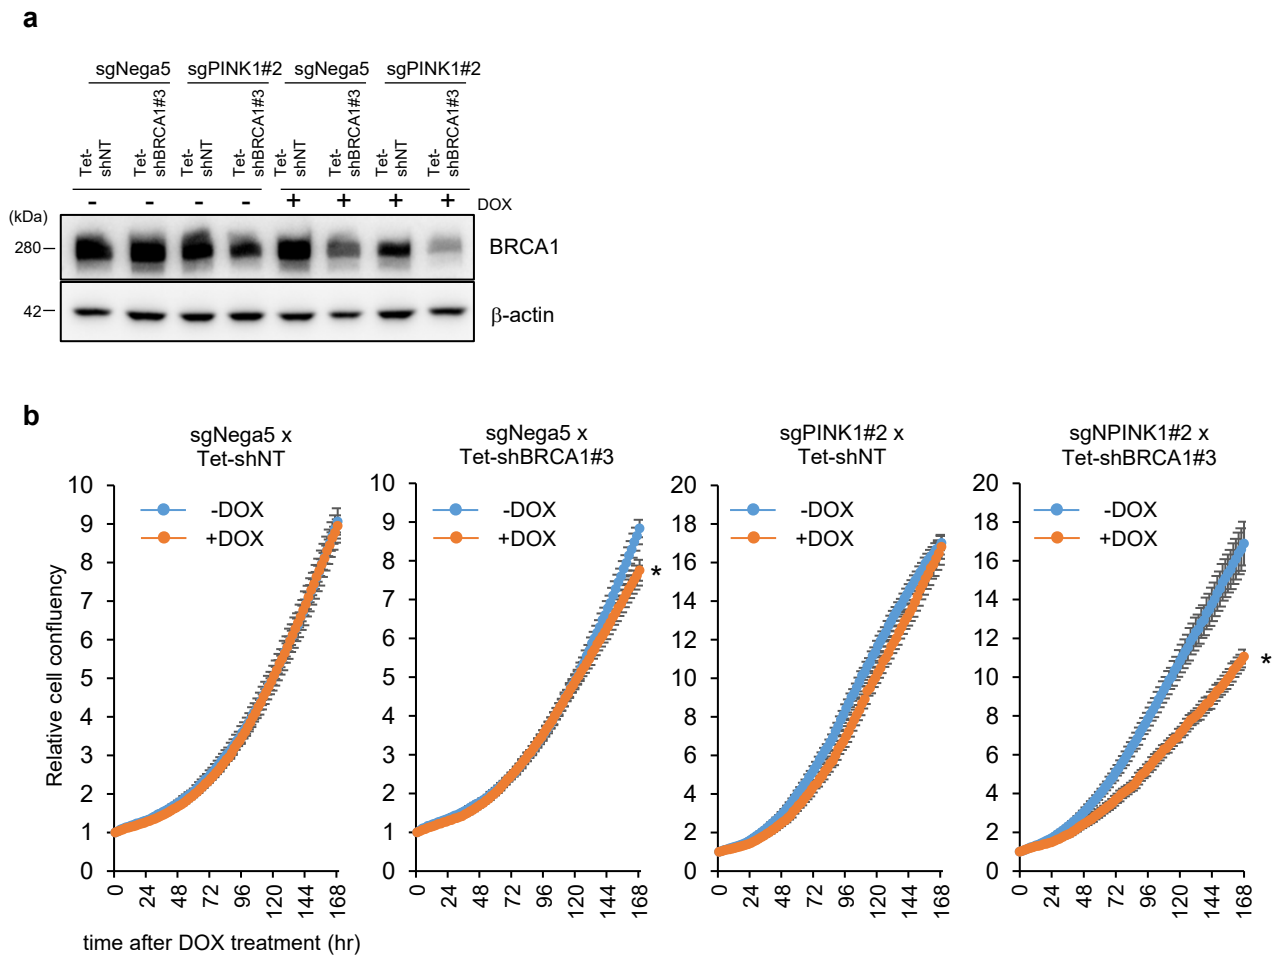

**Fig. S6. BRCA1 knockdown in PINK1-KO MCF7 cells reduced cell growth.** (a) sgNega5 and sgPINK1#2 MCF7 cells were introduced with Tet-shNT or Tet-shBRCA1#3 knockdown vector. BRCA1 expression was assessed after 0.1  $\mu\text{g}/\text{mL}$  DOX treatment for 48 h. (b) The cell growth of each type of cells was analyzed using the IncuCyte live-cell imaging system in the presence or absence of DOX (0.1  $\mu\text{g}/\text{mL}$ ). Bar = mean  $\pm$  S.E., n = 4, \* $p$  < 0.05 versus -DOX.

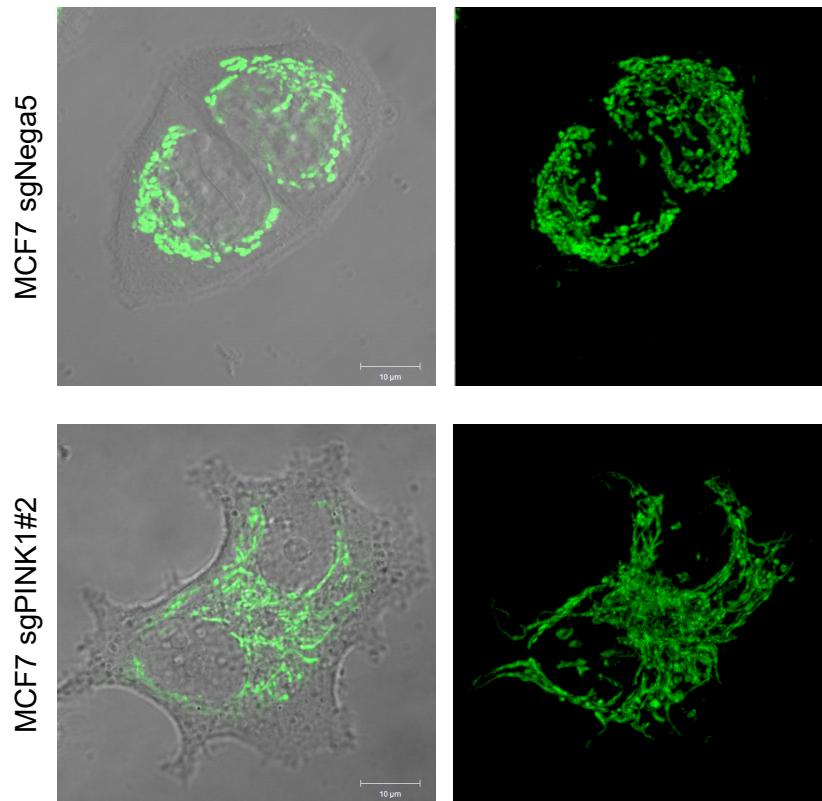

**Fig. S7. Mitochondrial morphology in PINK1-KO cells.** Mitochondria were stained with Mito Tracker Green FM (Green) and observed by confocal microscopy. The right panels show z-stacked images. Mitochondria in PINK1-KO MCF7 cells exhibited an elongated morphology. Scale bar = 10  $\mu$ m.

Fig. 1a

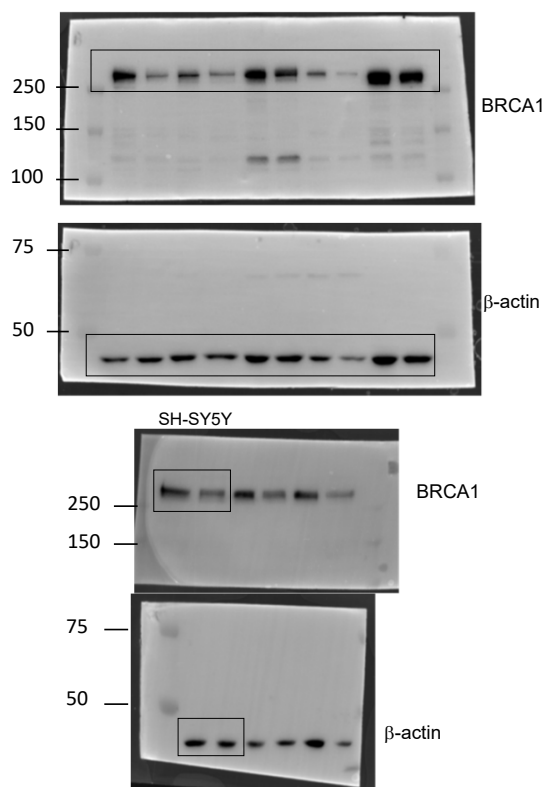

Fig. 1c

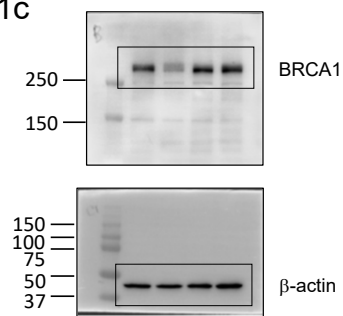

Fig. 1d

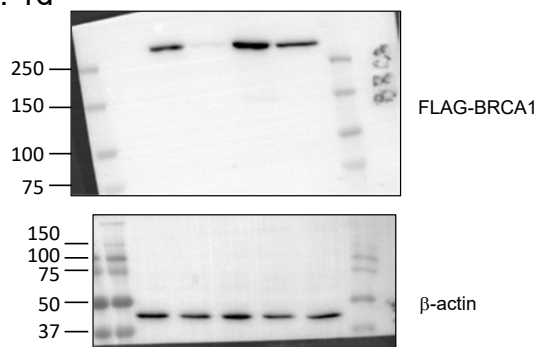

Figure S8. Original immunoblot images merged with corresponding marker images.

Fig. 1e

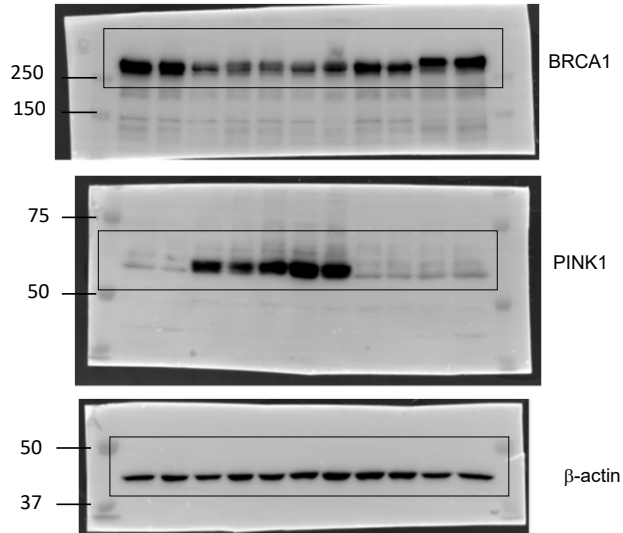

Fig. 1f (Source Data used for statistical analysis)

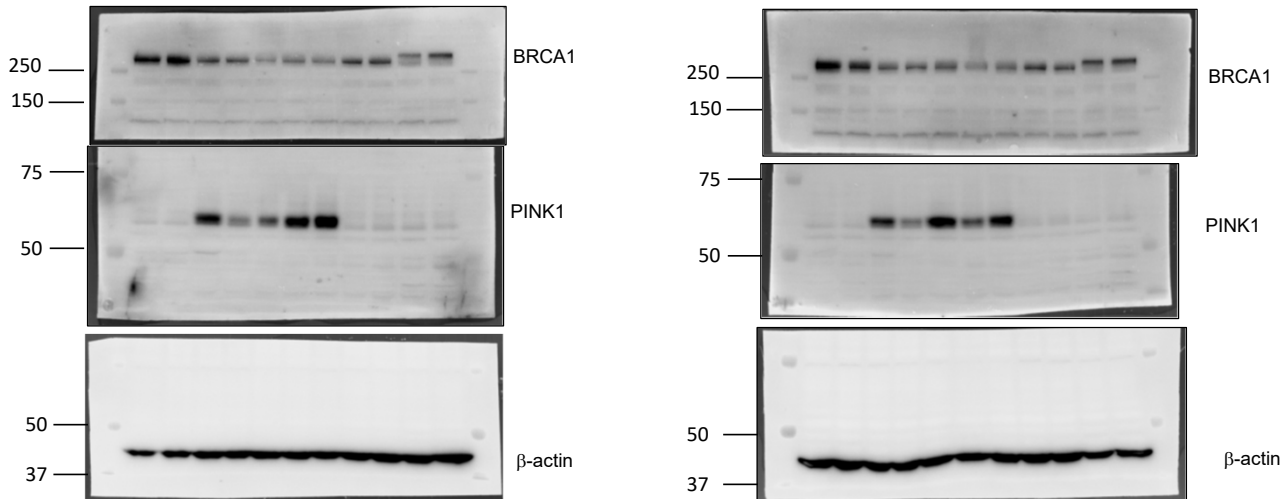

Figure S9. Original immunoblot images merged with corresponding marker images.

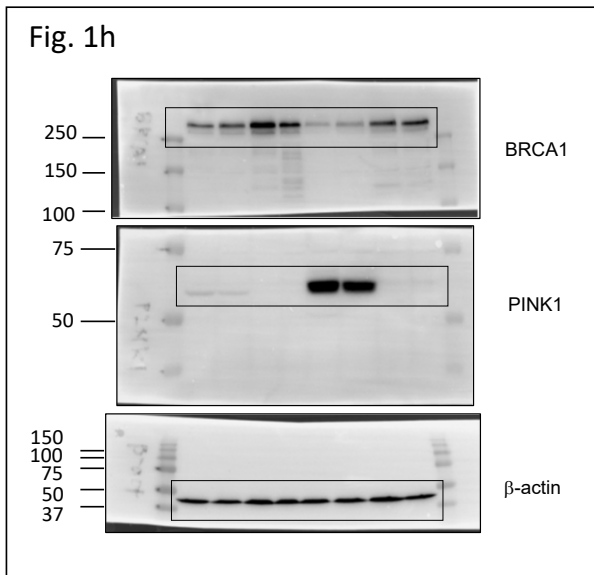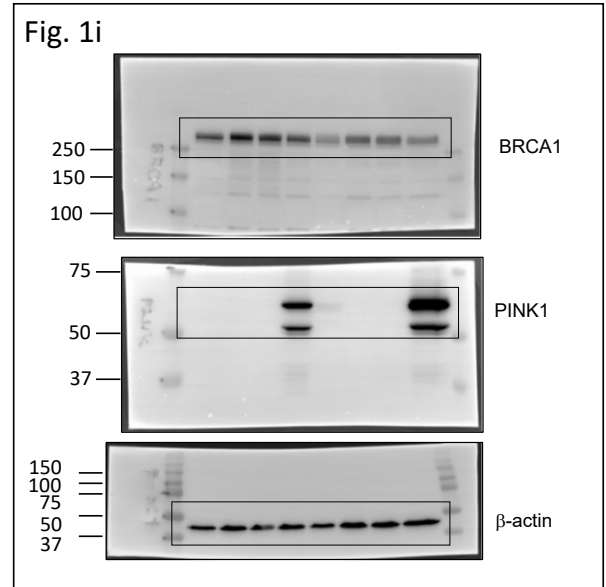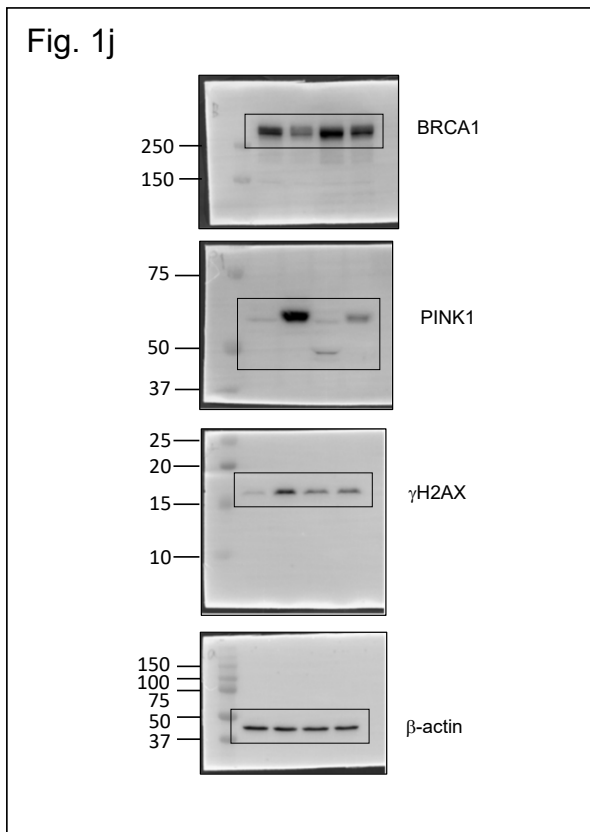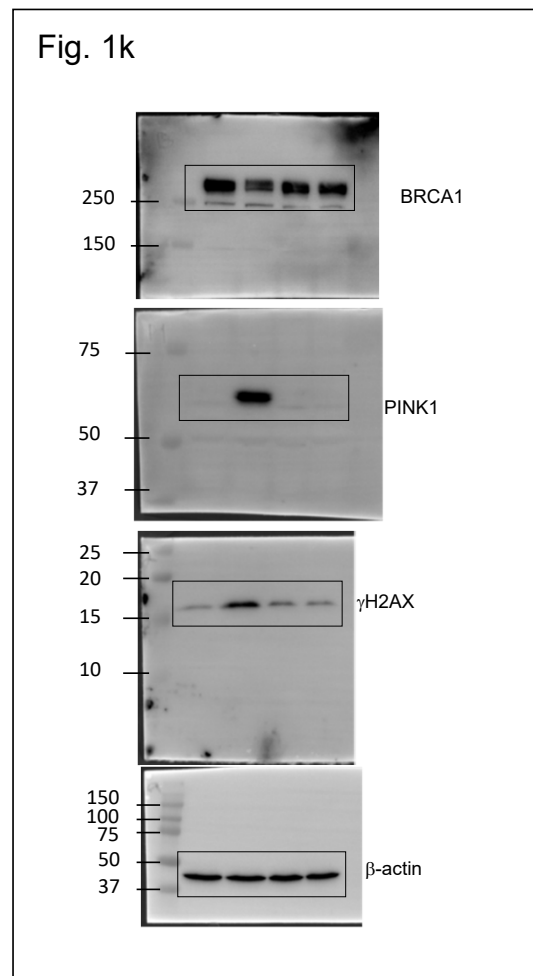

**Figure S10. Original immunoblot images merged with corresponding marker images.**

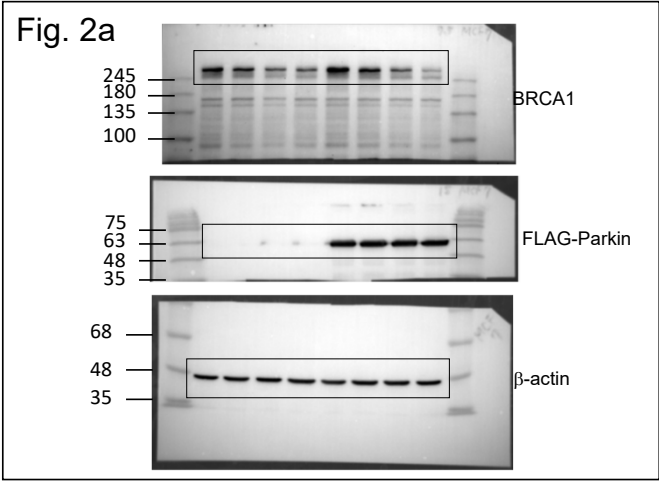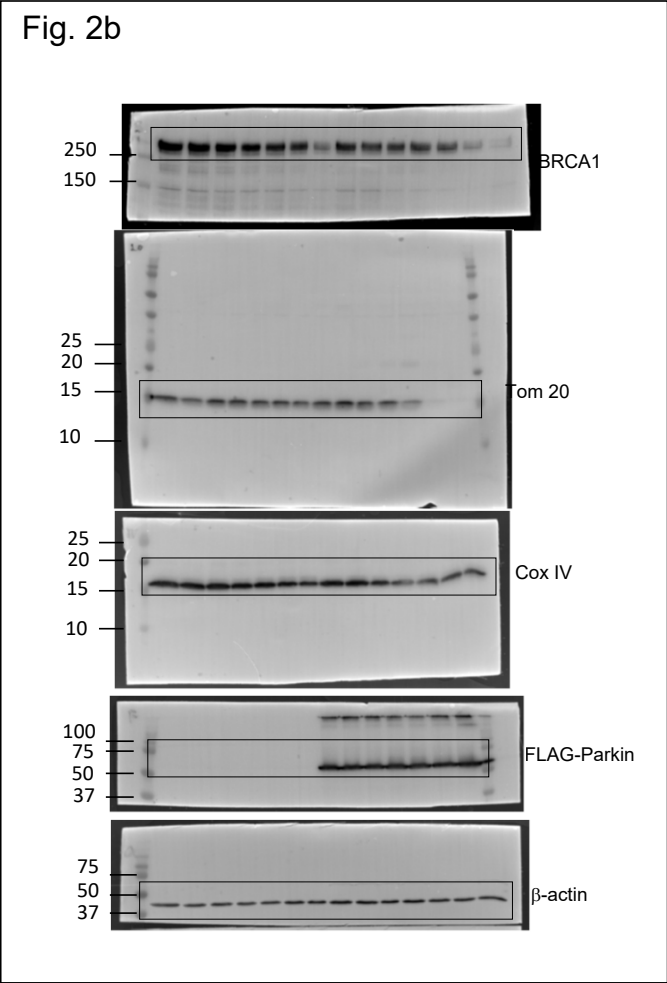

**Figure S11. Original immunoblot images merged with corresponding marker images.**

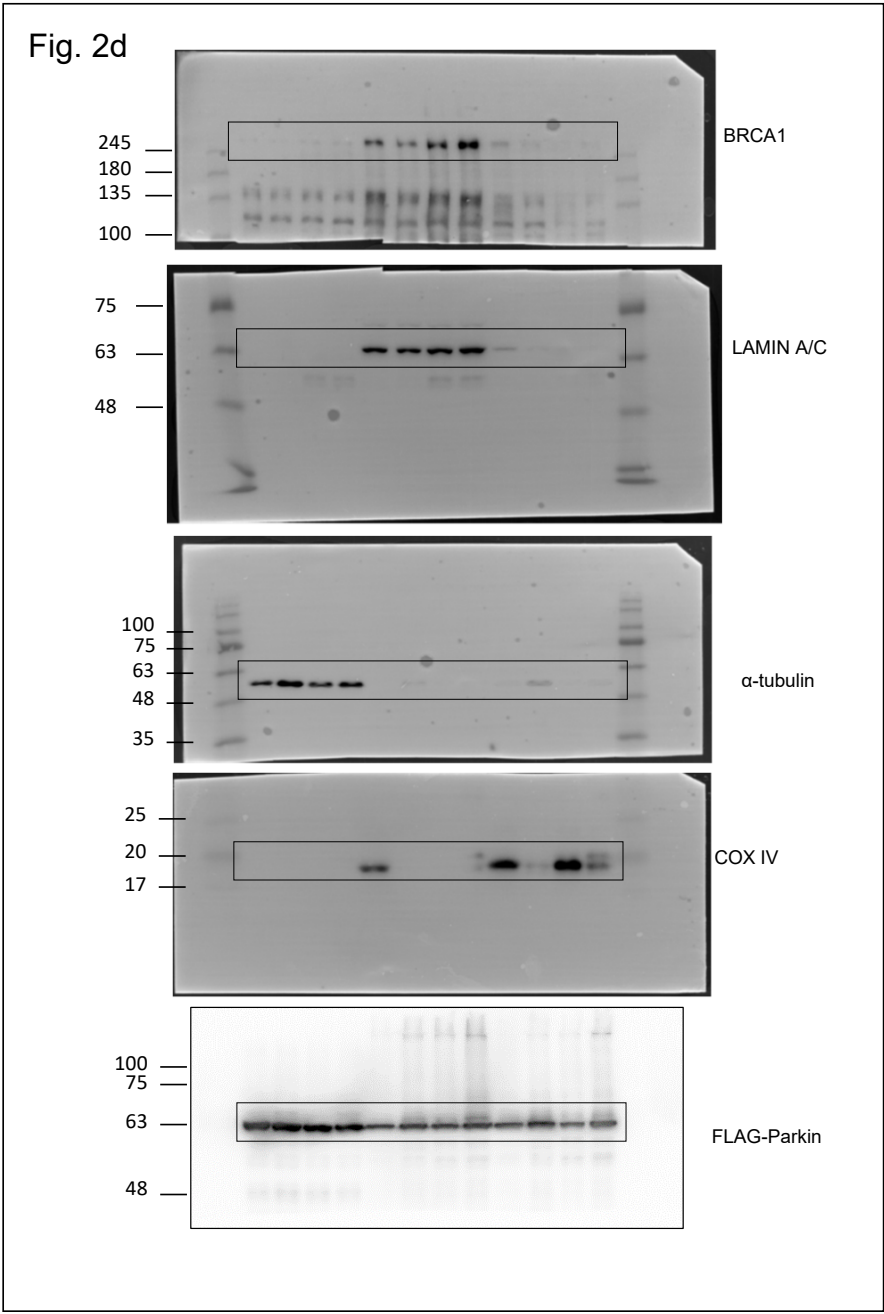

Figure S12. Original immunoblot images merged with corresponding marker images.



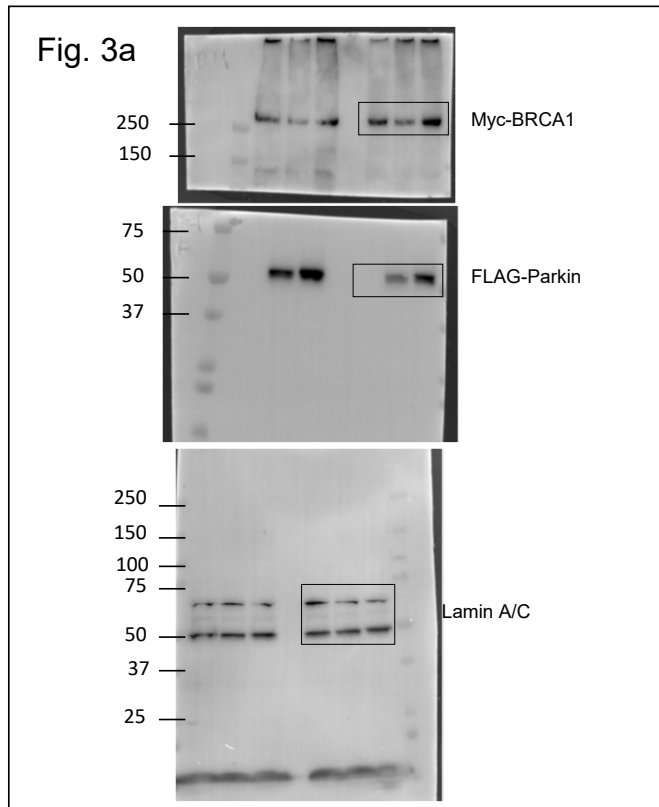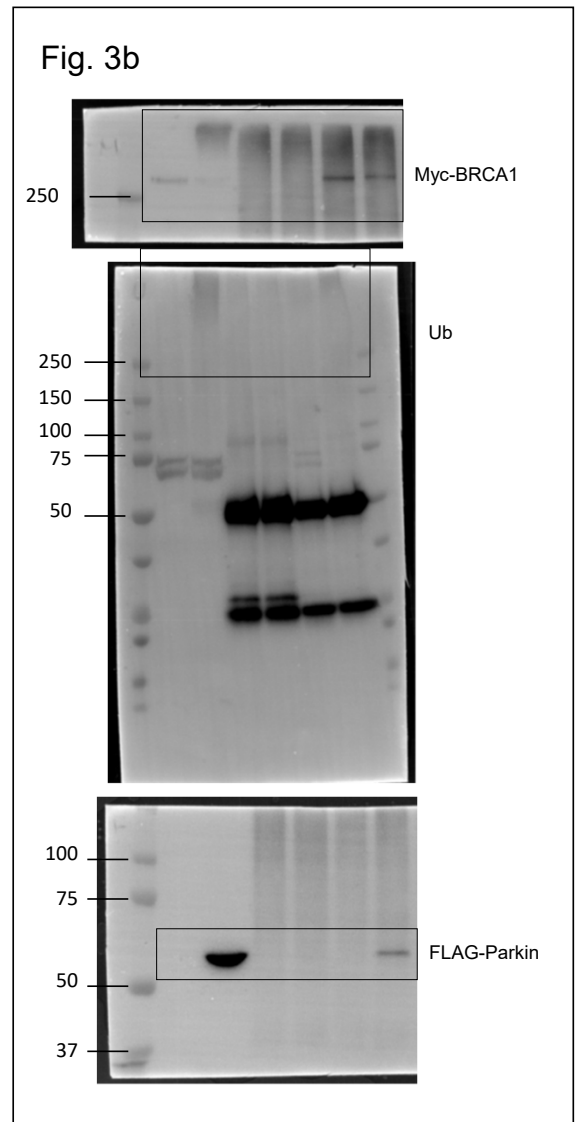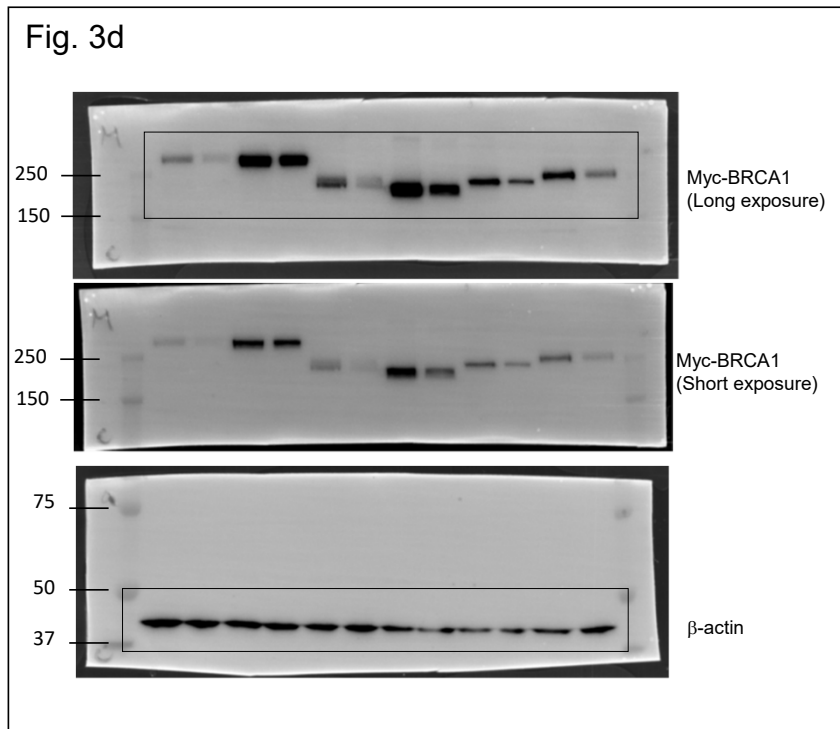

**Figure S13. Original immunoblot images merged with corresponding marker images.**

Fig. 3e

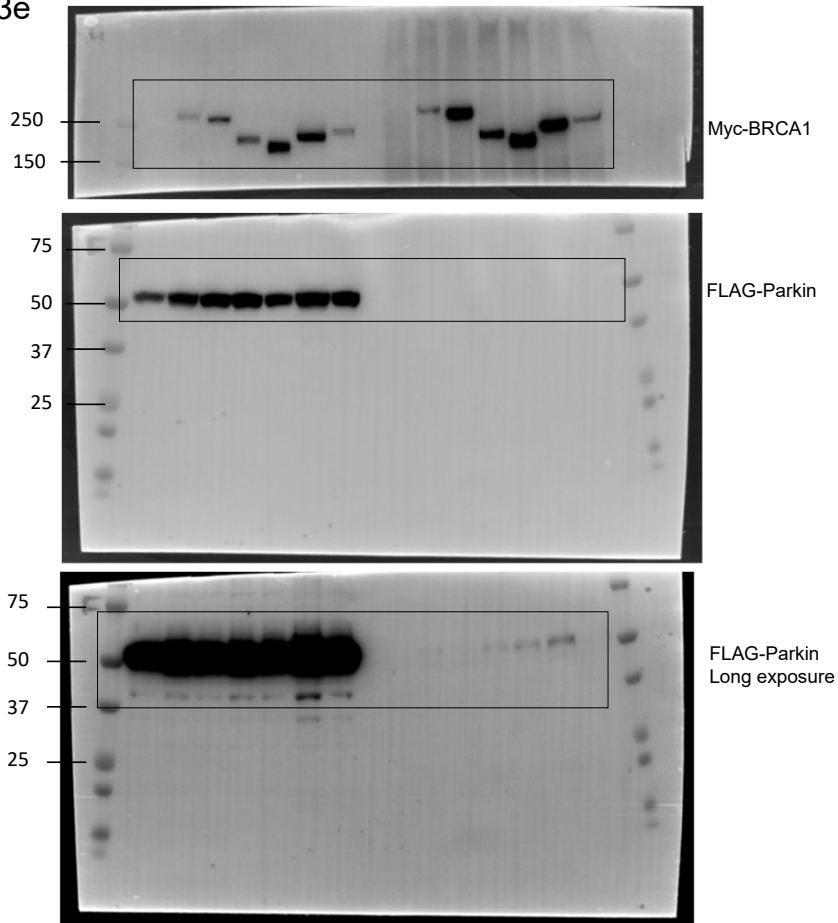

Fig. 3g

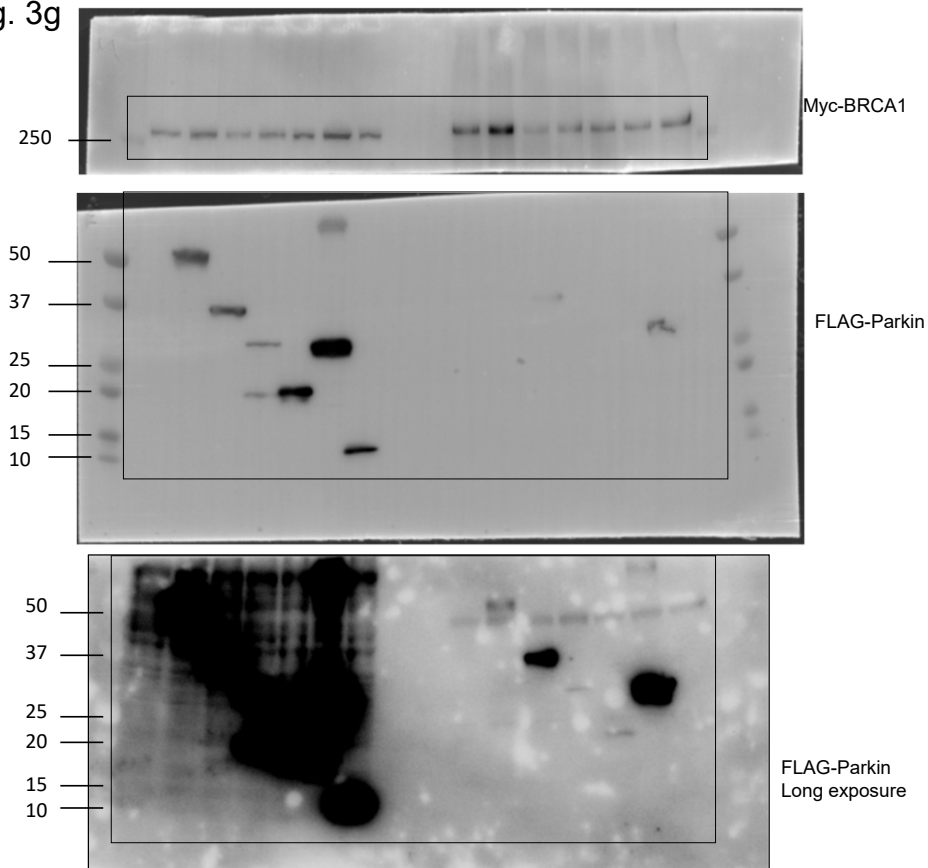

Figure S14. Original immunoblot images merged with corresponding marker images.

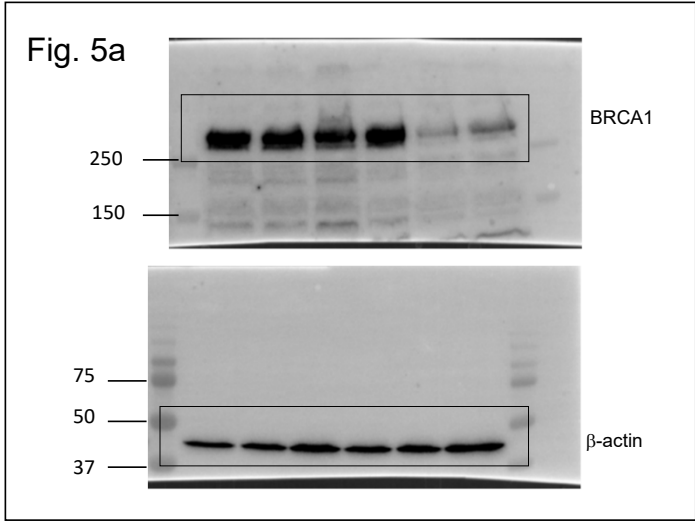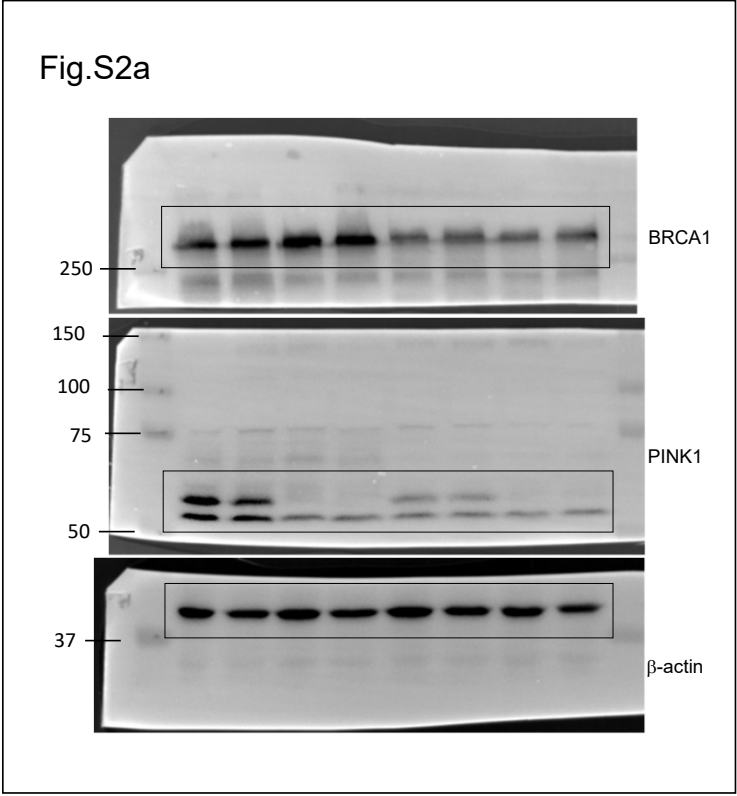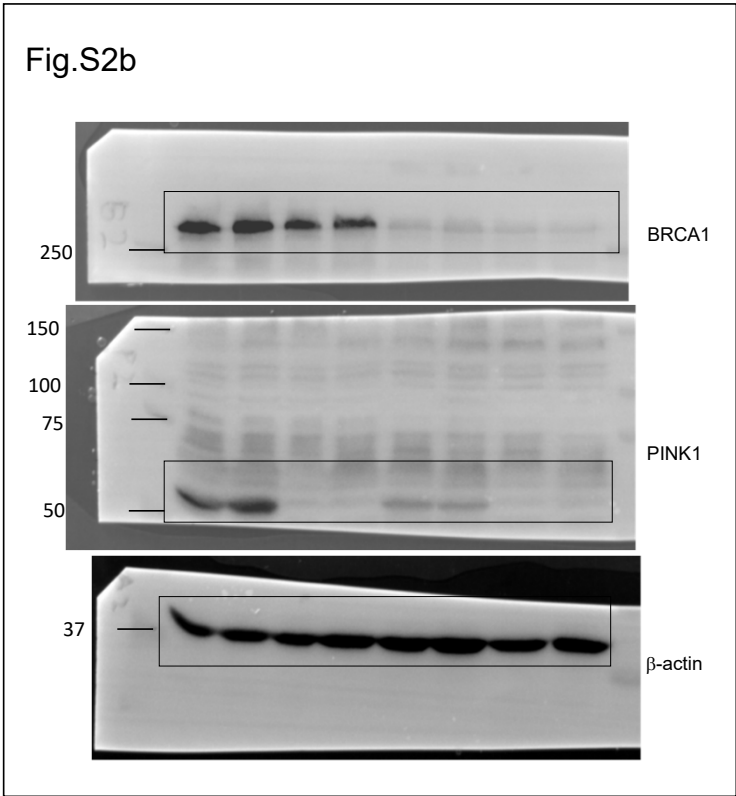

**Figure S15. Original immunoblot images merged with corresponding marker images.**

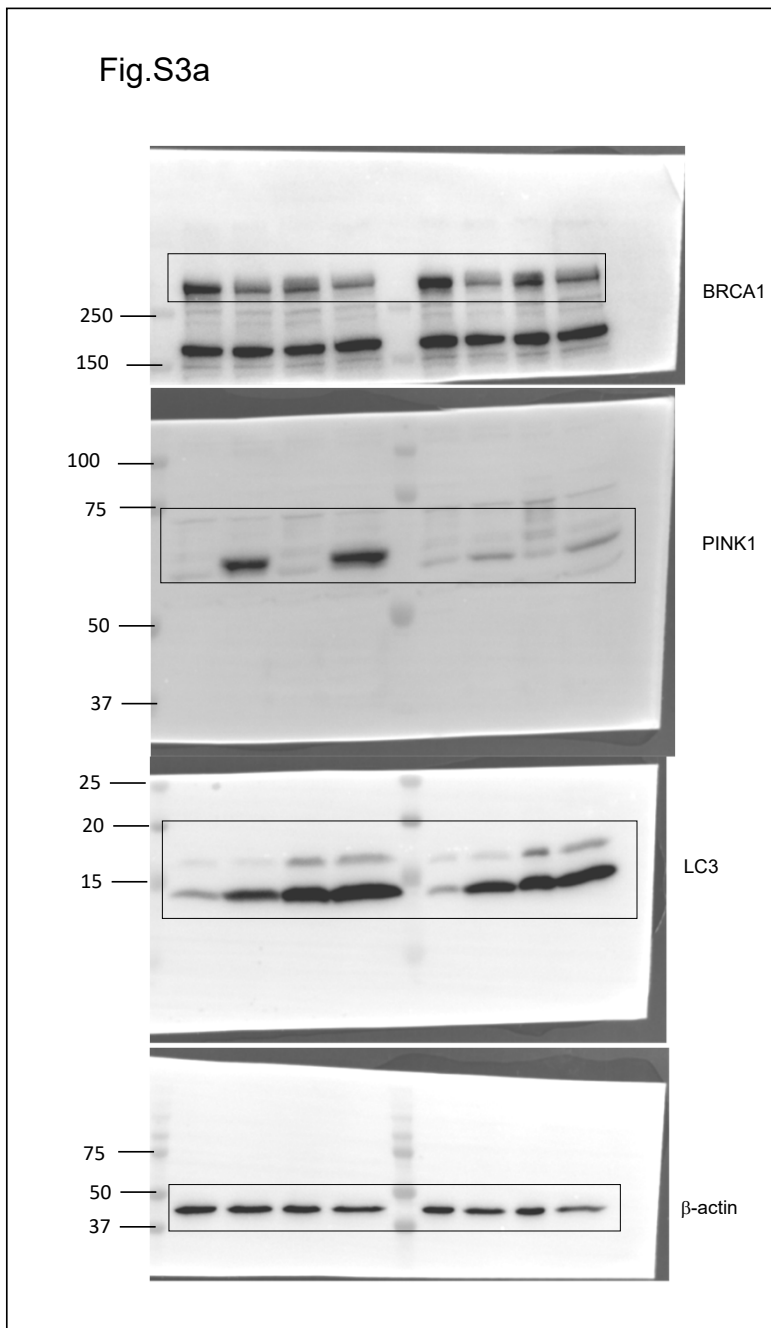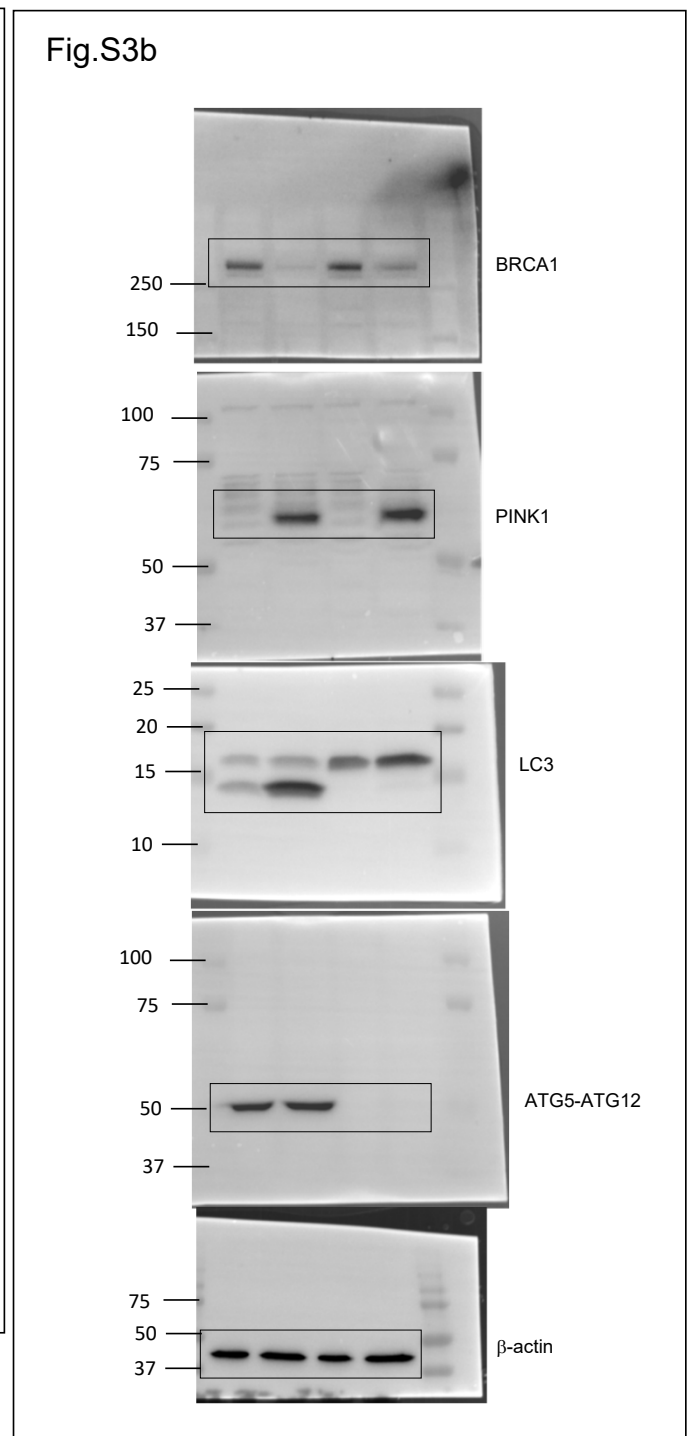

**Figure S16. Original immunoblot images merged with corresponding marker images.**

Fig. S5a

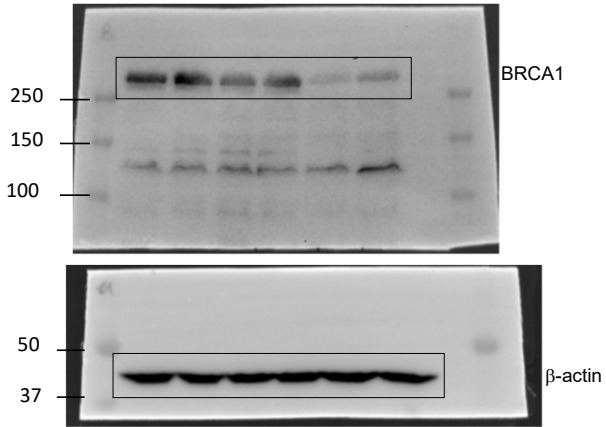

Fig. S6a

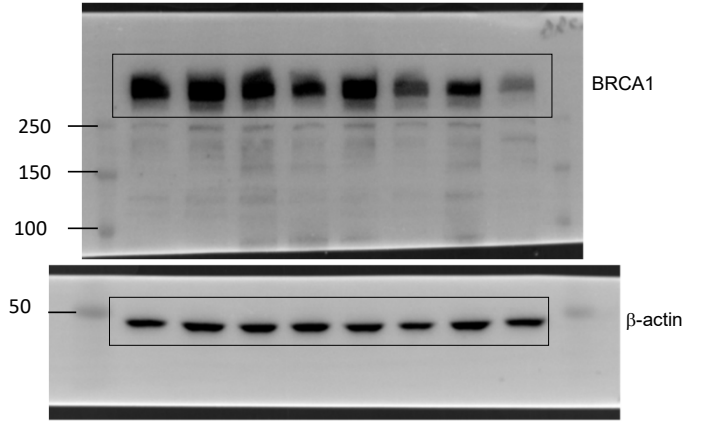

**Figure S17. Original immunoblot images merged with corresponding marker images.**
